# Supplementary material for: Sexual orientation differences in treatment expectation, alliance, and outcome among patients at risk for suicide in a public psychiatric hospital
Source: PubMed Central journal article supplement (PMC5433065; doi:10.1186/s12888-017-1337-8), 2017-05-15
Supplement: 12888_2017_1337_MOESM1_ESM.pdf [file 12888_2017_1337_MOESM1_ESM.pdf]

## **Online Supplement**

### **Detailed Results for Analyses in Paper**

For paper “Sexual Orientation Differences in Treatment Expectation, Alliance, and Outcome.

Findings from Patients at Risk for Suicide in a Public Psychiatric Hospital”

## Content

|       |                                                                  |    |
|-------|------------------------------------------------------------------|----|
| 1     | Comments to Statistical Analysis.....                            | 3  |
| 2     | Treatment Outcome – Difference Intake-Discharge Assessments..... | 4  |
| 2.1   | Change of Suicide Ideation.....                                  | 4  |
| 2.1.1 | Interaction with Confounders.....                                | 4  |
| 2.1.2 | Adjusting for Confounders.....                                   | 5  |
| 2.2   | Change of Hopelessness.....                                      | 7  |
| 2.2.1 | Interaction with Confounders.....                                | 7  |
| 2.2.2 | Adjusting for Confounders.....                                   | 8  |
| 2.3   | Change of Depression.....                                        | 10 |
| 2.3.1 | Interaction with Confounders.....                                | 10 |
| 2.3.2 | Adjusting for Confounders.....                                   | 11 |
| 3     | Responder Analysis.....                                          | 13 |
| 3.1   | Suicide Ideation.....                                            | 13 |
| 3.1.1 | Interactions with Confounders.....                               | 14 |
| 3.1.2 | Adjusting for Confounders.....                                   | 16 |
| 3.2   | Hopelessness.....                                                | 18 |
| 3.2.1 | Interactions with Confounders.....                               | 18 |
| 3.2.2 | Adjusting for Confounders.....                                   | 19 |
| 3.3   | Depression.....                                                  | 21 |
| 3.3.1 | Interactions with Confounders.....                               | 21 |
| 3.3.2 | Adjusting for Confounders.....                                   | 22 |
| 4     | Treatment Expectancy.....                                        | 24 |
| 3.4   | Interaction with Confounders.....                                | 24 |
| 3.4.1 | Nationality.....                                                 | 24 |
| 3.5   | Adjusting for Confounders.....                                   | 25 |
| 5     | Working Alliance.....                                            | 26 |
| 3.6   | Interaction with Confounders.....                                | 26 |
| 3.7   | Adjusting for Confounders.....                                   | 28 |

## 1 Comments to Statistical Analysis

These supplemental statistical results are carried out with R 3.1.3 using additional packages such as “psych” and “rms” (for some descriptive tabulation), ggplot2 (for interaction plots), and “foreign” (for importing SPSS files).

## 2 Treatment Outcome – Difference Intake-Discharge Assessments

### 2.1 Change of Suicide Ideation

#### Linear Regression – SM Status as only predictor

Residuals:

| Min     | 1Q     | Median | 3Q    | Max    |
|---------|--------|--------|-------|--------|
| -28.797 | -4.797 | -3.305 | 5.203 | 27.203 |

Coefficients:

|             | Estimate | Std. Error | t value | Pr(> t )   |
|-------------|----------|------------|---------|------------|
| (Intercept) | 4.7968   | 0.3475     | 13.804  | <2e-16 *** |
| smyes       | 0.5085   | 0.7639     | 0.666   | 0.506      |

---

Signif. codes: 0 '\*\*\*' 0.001 '\*\*' 0.01 '\*' 0.05 '.' 0.1 ' ' 1

Residual standard error: 7.786 on 631 degrees of freedom

Multiple R-squared: 0.0007019, Adjusted R-squared: -0.0008818

F-statistic: 0.4432 on 1 and 631 DF, p-value: 0.5058

#### 2.1.1 Interaction with Confounders

##### F7 Diagnosis

lm(formula = d\_BSI ~ sm \* F7)

Residuals:

| Min    | 1Q    | Median | 3Q   | Max   |
|--------|-------|--------|------|-------|
| -28.83 | -4.83 | -3.00  | 5.17 | 27.17 |

Coefficients:

|             | Estimate | Std. Error | t value | Pr(> t )   |
|-------------|----------|------------|---------|------------|
| (Intercept) | 4.8298   | 0.3559     | 13.569  | <2e-16 *** |
| smyes       | 0.1702   | 0.7780     | 0.219   | 0.827      |
| F7yes       | -0.6375  | 1.5640     | -0.408  | 0.684      |
| smyes:F7yes | 8.6375   | 3.8711     | 2.231   | 0.026 *    |

---

Signif. codes: 0 '\*\*\*' 0.001 '\*\*' 0.01 '\*' 0.05 '.' 0.1 ' ' 1

Residual standard error: 7.766 on 629 degrees of freedom

Multiple R-squared: 0.009005, Adjusted R-squared: 0.004278

F-statistic: 1.905 on 3 and 629 DF, p-value: 0.1275

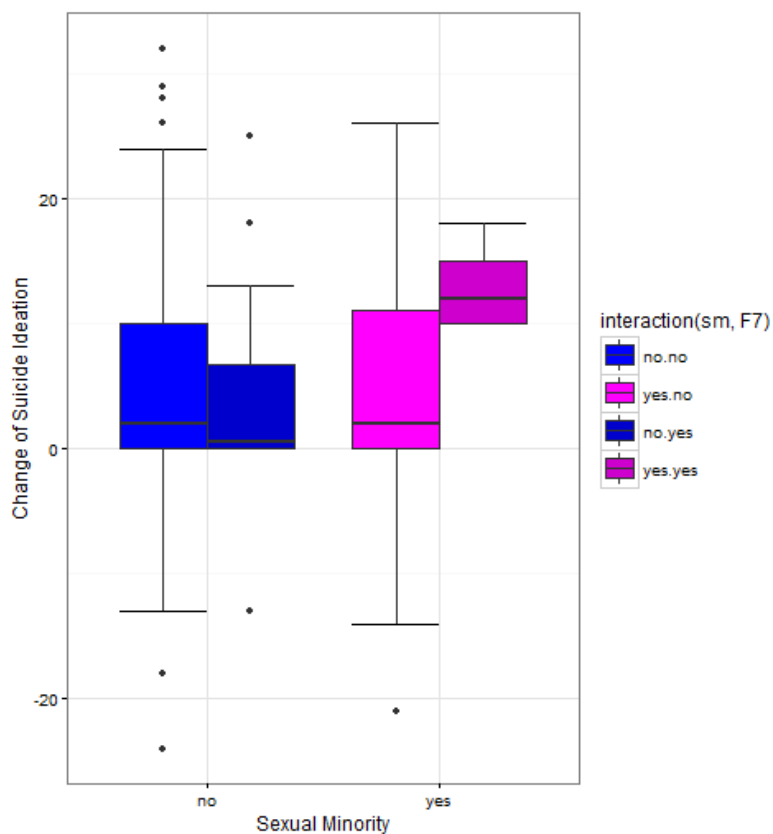

## 2.1.2 Adjusting for Confounders

### Full Multivariate Model

Call:

```
lm(formula = d_BSI ~ nationality + F3 + F7*sm + log(length_stay) * sm)
```

Residuals:

| Min     | 1Q     | Median | 3Q    | Max    |
|---------|--------|--------|-------|--------|
| -26.363 | -5.141 | -2.676 | 4.662 | 30.568 |

Coefficients:

|                        | Estimate | Std. Error | t value | Pr(> t )   |
|------------------------|----------|------------|---------|------------|
| (Intercept)            | 3.2972   | 2.1011     | 1.569   | 0.11710    |
| nationality            | -1.6587  | 0.9499     | -1.746  | 0.08127 .  |
| F3yes                  | 2.1572   | 0.7224     | 2.986   | 0.00293 ** |
| F7yes                  | -0.5045  | 1.5524     | -0.325  | 0.74528    |
| smyes                  | 2.2559   | 3.6490     | 0.618   | 0.53666    |
| log(length_stay)       | 0.5845   | 0.5730     | 1.020   | 0.30806    |
| F7yes:smyes            | 8.1731   | 3.8412     | 2.128   | 0.03375 *  |
| smyes:log(length_stay) | -0.6770  | 1.1548     | -0.586  | 0.55790    |

---

Signif. codes: 0 '\*\*\*' 0.001 '\*\*' 0.01 '\*' 0.05 '.' 0.1 ' ' 1

Residual standard error: 7.701 on 625 degrees of freedom

Multiple R-squared: 0.0317, Adjusted R-squared: 0.02086

F-statistic: 2.923 on 7 and 625 DF, p-value: 0.00512

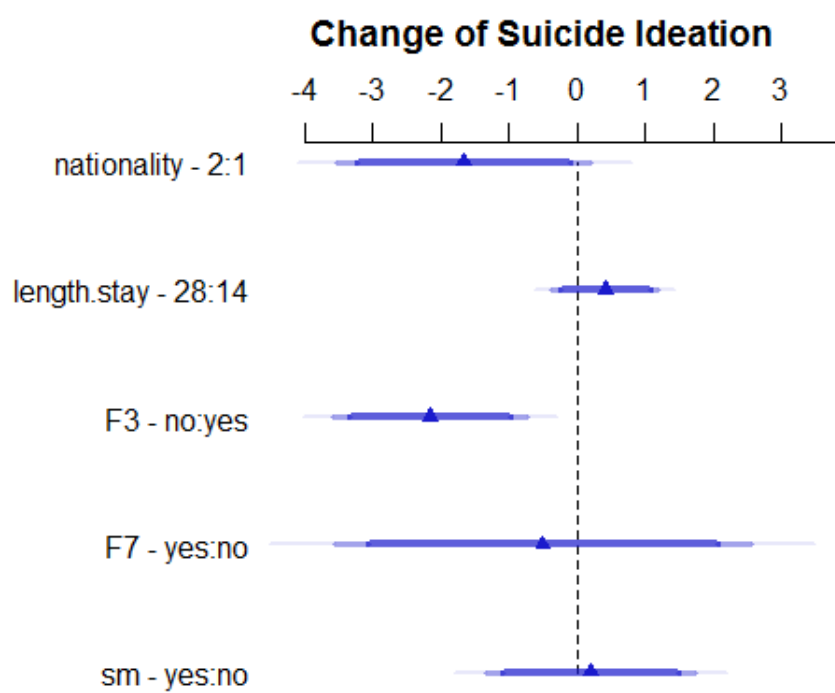

Adjusted to:F7=no sm=no length.stay=21

## 2.2 Change of Hopelessness

### Linear Regression – SM Status as only predictor

Residuals:

| Min     | 1Q     | Median | 3Q    | Max    |
|---------|--------|--------|-------|--------|
| -28.797 | -4.797 | -3.305 | 5.203 | 27.203 |

Coefficients:

|             | Estimate | Std. Error | t value | Pr(> t )   |
|-------------|----------|------------|---------|------------|
| (Intercept) | 4.7968   | 0.3475     | 13.804  | <2e-16 *** |
| smyes       | 0.5085   | 0.7639     | 0.666   | 0.506      |

---

Signif. codes: 0 '\*\*\*' 0.001 '\*\*' 0.01 '\*' 0.05 '.' 0.1 ' ' 1

Residual standard error: 7.786 on 631 degrees of freedom

Multiple R-squared: 0.0007019, Adjusted R-squared: -0.0008818

F-statistic: 0.4432 on 1 and 631 DF, p-value: 0.5058

### 2.2.1 Interaction with Confounders

#### F6 Diagnosis

```
lm(formula = d_BHS ~ sm * F6)
```

Residuals:

| Min      | 1Q      | Median  | 3Q     | Max     |
|----------|---------|---------|--------|---------|
| -13.5024 | -3.5024 | -0.5024 | 2.7634 | 15.4976 |

Coefficients:

|             | Estimate | Std. Error | t value | Pr(> t )   |
|-------------|----------|------------|---------|------------|
| (Intercept) | 3.5024   | 0.2378     | 14.726  | <2e-16 *** |
| smyes       | 0.7341   | 0.5542     | 1.325   | 0.1858     |
| F6yes       | 0.2420   | 0.5617     | 0.431   | 0.6667     |
| smyes:F6yes | -2.1891  | 1.0860     | -2.016  | 0.0442 *   |

---

Signif. codes: 0 '\*\*\*' 0.001 '\*\*' 0.01 '\*' 0.05 '.' 0.1 ' ' 1

Residual standard error: 4.828 on 629 degrees of freedom

Multiple R-squared: 0.00733, Adjusted R-squared: 0.002596

F-statistic: 1.548 on 3 and 629 DF, p-value: 0.2009

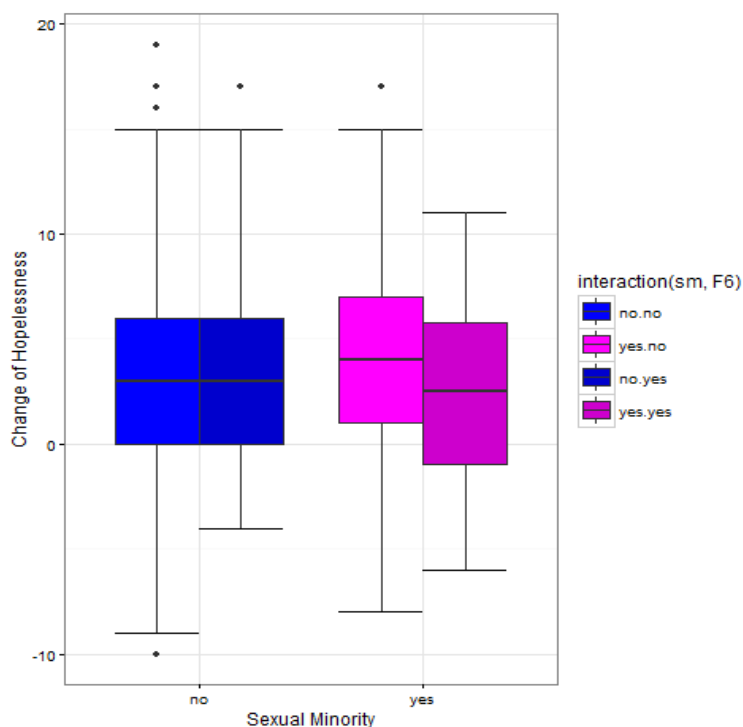

## 2.2.2 Adjusting for Confounders

### Full Multivariate Model

Call:

```
lm(formula = d_BHS ~ income + m_languag + F0 + F3 + F8 +
    F6 * sm + log(length_stay))
```

Residuals:

| Min      | 1Q      | Median  | 3Q     | Max     |
|----------|---------|---------|--------|---------|
| -13.0885 | -3.3232 | -0.1569 | 3.0194 | 16.0740 |

Coefficients:

|                  | Estimate   | Std. Error | t value | Pr(> t ) |     |
|------------------|------------|------------|---------|----------|-----|
| (Intercept)      | 4.3594531  | 1.2343305  | 3.532   | 0.000443 | *** |
| income           | 0.0004242  | 0.0001659  | 2.556   | 0.010811 | *   |
| m_languag        | -1.6542639 | 0.6420080  | -2.577  | 0.010204 | *   |
| F0yes            | 1.6797839  | 1.0501397  | 1.600   | 0.110198 |     |
| F3yes            | 0.8831951  | 0.4548372  | 1.942   | 0.052614 | .   |
| F8yes            | -2.0280383 | 1.1485324  | -1.766  | 0.077925 | .   |
| F6yes            | 0.6082591  | 0.5630221  | 1.080   | 0.280406 |     |
| smyes            | 0.8180816  | 0.5514322  | 1.484   | 0.138432 |     |
| log(length_stay) | -0.1074547 | 0.3098608  | -0.347  | 0.728871 |     |
| F6yes:smyes      | -2.3064893 | 1.0792971  | -2.137  | 0.032984 | *   |

---

Signif. codes: 0 '\*\*\*' 0.001 '\*\*' 0.01 '\*' 0.05 '.' 0.1 ' ' 1

Residual standard error: 4.76 on 623 degrees of freedom

Multiple R-squared: 0.04391, Adjusted R-squared: 0.0301

F-statistic: 3.179 on 9 and 623 DF, p-value: 0.0009075



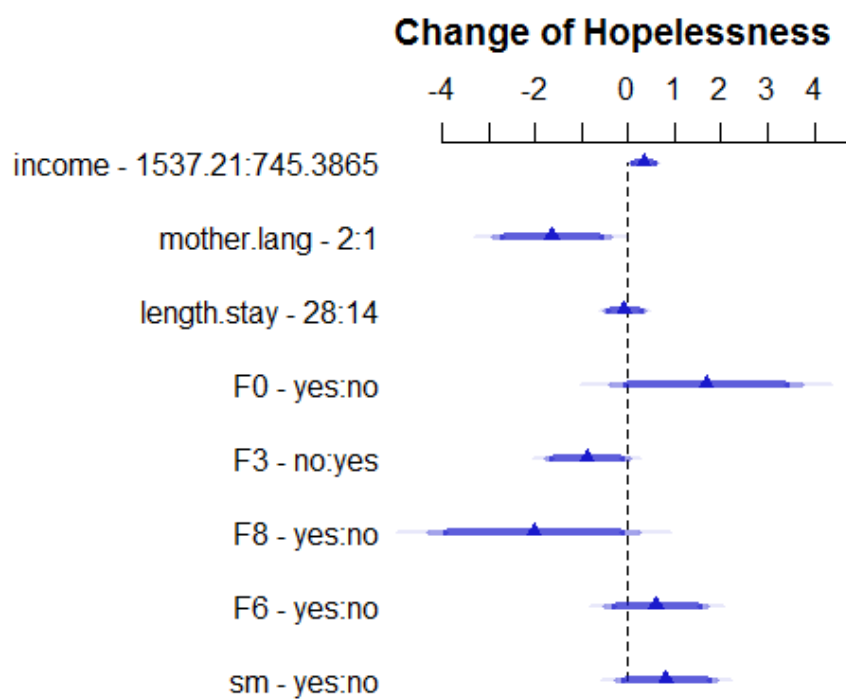

Adjusted to:F6=no sm=no

## 2.3 Change of Depression

### Linear Regression – SM Status as only predictor

Residuals:

| Min      | 1Q      | Median  | 3Q     | Max     |
|----------|---------|---------|--------|---------|
| -13.5458 | -3.5458 | -0.5458 | 2.4542 | 15.4542 |

Coefficients:

|             | Estimate | Std. Error | t value | Pr(> t )   |
|-------------|----------|------------|---------|------------|
| (Intercept) | 3.5458   | 0.2159     | 16.423  | <2e-16 *** |
| smyes       | 0.1259   | 0.4746     | 0.265   | 0.791      |

---

Signif. codes: 0 '\*\*\*' 0.001 '\*\*' 0.01 '\*' 0.05 '.' 0.1 ' ' 1

Residual standard error: 4.837 on 631 degrees of freedom

Multiple R-squared: 0.0001116, Adjusted R-squared: -0.001473

F-statistic: 0.07042 on 1 and 631 DF, p-value: 0.7908

#### 2.3.1 Interaction with Confounders

##### Length of stay

lm(formula = d\_BDI ~ sm \* length\_stay)

Residuals:

| Min     | 1Q     | Median | 3Q    | Max    |
|---------|--------|--------|-------|--------|
| -29.366 | -7.309 | -0.534 | 6.677 | 34.391 |

Coefficients:

|                   | Estimate | Std. Error | t value | Pr(> t )   |
|-------------------|----------|------------|---------|------------|
| (Intercept)       | 12.16639 | 0.67357    | 18.063  | <2e-16 *** |
| smyes             | 2.67140  | 1.42736    | 1.872   | 0.0617 .   |
| length_stay       | 0.01427  | 0.01957    | 0.729   | 0.4664     |
| smyes:length_stay | -0.08287 | 0.03400    | -2.437  | 0.0151 *   |

---

Signif. codes: 0 '\*\*\*' 0.001 '\*\*' 0.01 '\*' 0.05 '.' 0.1 ' ' 1

Residual standard error: 10.78 on 629 degrees of freedom

Multiple R-squared: 0.01051, Adjusted R-squared: 0.005794

F-statistic: 2.228 on 3 and 629 DF, p-value: 0.08382

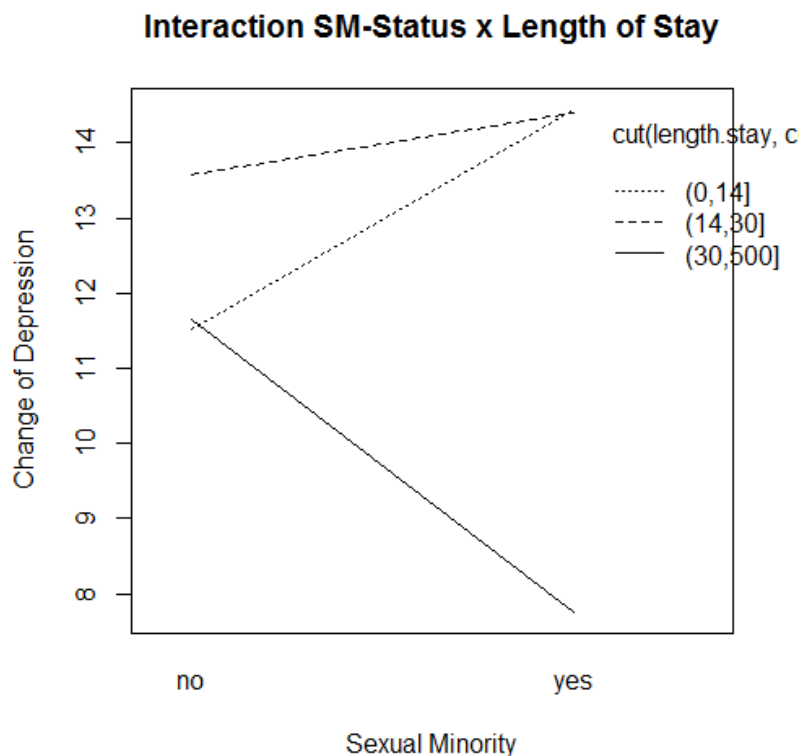

SM vs. heterosexuals: Length of Stay < 15 days  $d = -0.28$   
 > 30 days  $d = 0.34$

### 2.3.2 Adjusting for Confounders

#### Full Multivariate Model

```
Call:
lm(formula = d_BDI ~ income + m_languag + F3 + log(length_stay) *
    sm)
```

Residuals:

| Min     | 1Q     | Median | 3Q    | Max    |
|---------|--------|--------|-------|--------|
| -30.992 | -7.020 | -0.964 | 6.579 | 33.256 |

Coefficients:

|                        | Estimate   | Std. Error | t value | Pr(> t )     |
|------------------------|------------|------------|---------|--------------|
| (Intercept)            | 14.1500874 | 2.9502233  | 4.796   | 2.02e-06 *** |
| income                 | 0.0007955  | 0.0003645  | 2.182   | 0.02946 *    |
| m_languag              | -4.5701916 | 1.4198232  | -3.219  | 0.00135 **   |
| F3yes                  | 3.9406123  | 0.9907661  | 3.977   | 7.78e-05 *** |
| log(length_stay)       | -0.2130309 | 0.7837679  | -0.272  | 0.78586      |
| smyes                  | 11.7819455 | 4.9793312  | 2.366   | 0.01828 *    |
| log(length_stay):smyes | -3.6224037 | 1.5779521  | -2.296  | 0.02203 *    |

---

Signif. codes: 0 '\*\*\*' 0.001 '\*\*' 0.01 '\*' 0.05 '.' 0.1 ' ' 1

Residual standard error: 10.54 on 626 degrees of freedom  
 Multiple R-squared: 0.05895, Adjusted R-squared: 0.04993  
 F-statistic: 6.536 on 6 and 626 DF, p-value: 1.046e-06

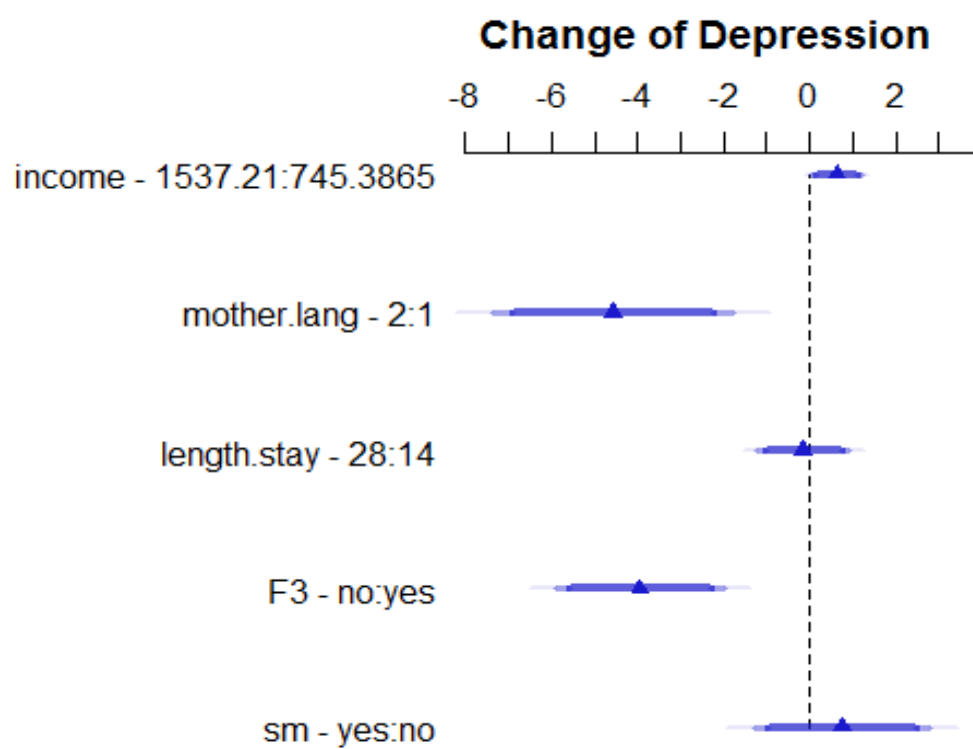

Adjusted to:length.stay=21 sm=no

### 3 Responder Analysis

Procedure according to Hiller, W., Schindler, A.C. & Lambert, M. J. (2011). Defining response and remission in psychotherapy research: A comparison of the RCI and the method of percent improvement. *Psychotherapy Research*, 22, 1 – 11.

Responder if:

1. baseline is in the pathological range and there is at least 50% improvement in the clinical range (baseline minus cut-off). For example, if a patient scores 30 on the BDI at baseline and 20 at follow-up (10-point difference), the cut-off is 14+, then this results in a percentual improvement of  $10 / (30-14) * 100 = 62.5\%$
2. baseline is in the pathological range and the overall improvement has to be at least 25% in the general range (because if a patient's baseline is only slightly above the cut-off, then it is too easy to gain > 50% possible change in the clinical range). E.g, if a patient's baseline is 16 on the BDI and 14 after treatment, then this is an overall improvement of  $(16-14)/16*100 = 12.5\%$  (but it would be 100% with criterion 1).
3. Patients can only be responders or nonresponders if the baseline is in the pathological range.

#### 3.1 Suicide Ideation

Cutoff > 4 (arbitrary)

|     |  | res_BSI      |                 |                    |
|-----|--|--------------|-----------------|--------------------|
| sm  |  | 1. responder | 2. nonresponder | 3. nonpathological |
| no  |  | 194          | 74              | 234                |
| yes |  | 57           | 26              | 48                 |

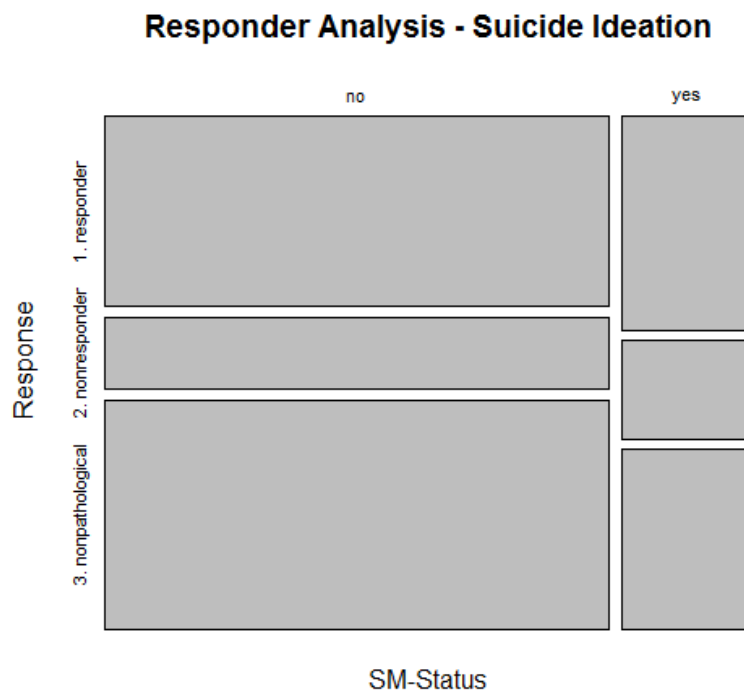

Pearson's Chi-squared test

data: sm and res\_BSI

X-squared = 4.6542, df = 2, p-value = 0.09758

### 3.1.1 Interactions with Confounders

#### F3 Diagnosis

```
lrm(formula = res_BSI_bin ~ sm * F3)
```

|                 | Obs   | 351 | Model Likelihood |        | Discrimination |       | Rank Discrim. |       |
|-----------------|-------|-----|------------------|--------|----------------|-------|---------------|-------|
|                 |       |     | Ratio Test       |        | Indexes        |       | Indexes       |       |
|                 |       |     | LR chi2          | 9.51   | R2             | 0.038 | C             | 0.563 |
| 1. responder    | 251   |     | d.f.             | 3      | g              | 0.236 | Dxy           | 0.126 |
| 2. nonresponder | 100   |     | Pr(> chi2)       | 0.0232 | gr             | 1.267 | gamma         | 0.221 |
| max  deriv      | 2e-11 |     |                  |        | gp             | 0.052 | tau-a         | 0.052 |
|                 |       |     |                  |        | Brier          | 0.198 |               |       |

|                 | Coef    | S.E.   | wald Z | Pr(> Z ) |
|-----------------|---------|--------|--------|----------|
| Intercept       | -0.8473 | 0.3086 | -2.75  | 0.0060   |
| sm=yes          | 1.2993  | 0.5736 | 2.27   | 0.0235   |
| F3=yes          | -0.1441 | 0.3442 | -0.42  | 0.6755   |
| sm=yes * F3=yes | -1.5119 | 0.6625 | -2.28  | 0.0225   |

Oddsratio without F3: 3.56 (1.16-11.67) (SM more likely nonresp.)  
 Oddsratio with F3: 0.81 (0.41-1.53)

#### F6 Diagnosis

##### Logistic Regression Model

```
lrm(formula = res_BSI_bin ~ sm * F6)
```

Frequencies of Missing Values Due to Each Variable

|                 | Obs   | 351 | Model Likelihood |        | Discrimination |       | Rank Discrim. |       |
|-----------------|-------|-----|------------------|--------|----------------|-------|---------------|-------|
|                 |       |     | Ratio Test       |        | Indexes        |       | Indexes       |       |
|                 |       |     | LR chi2          | 12.59  | R2             | 0.051 | C             | 0.594 |
| 1. responder    | 251   |     | d.f.             | 3      | g              | 0.366 | Dxy           | 0.187 |
| 2. nonresponder | 100   |     | Pr(> chi2)       | 0.0056 | gr             | 1.442 | gamma         | 0.301 |
| max  deriv      | 1e-12 |     |                  |        | gp             | 0.077 | tau-a         | 0.077 |
|                 |       |     |                  |        | Brier          | 0.196 |               |       |

|                 | Coef    | S.E.   | wald Z | Pr(> Z ) |
|-----------------|---------|--------|--------|----------|
| Intercept       | -1.0269 | 0.1601 | -6.42  | <0.0001  |
| sm=yes          | -0.4547 | 0.3852 | -1.18  | 0.2378   |
| F6=yes          | 0.2428  | 0.3082 | 0.79   | 0.4308   |
| sm=yes * F6=yes | 1.4464  | 0.5976 | 2.42   | 0.0155   |

Oddsratio without F6: 0.64 (0.29-1.33) (SM less likely nonresp.)  
 Oddsratio with F6: 2.65 (1.08-1.68)

## Length of Stay

```
lrm(formula = res_BSI_bin ~ sm * length_stay)
```

|                 |       | Model Likelihood<br>Ratio Test | Discrimination<br>Indexes | Rank Discrim.<br>Indexes |
|-----------------|-------|--------------------------------|---------------------------|--------------------------|
| Obs             | 351   | LR chi2 10.76                  | R2 0.043                  | C 0.564                  |
| 1. responder    | 251   | d.f. 3                         | g 0.224                   | Dxy 0.128                |
| 2. nonresponder | 100   | Pr(> chi2) 0.0131              | gr 1.252                  | gamma 0.145              |
| max  deriv      | 3e-04 |                                | gp 0.042                  | tau-a 0.052              |
|                 |       |                                | Brier 0.197               |                          |

|                      | Coef    | S.E.   | wald Z | Pr(> Z ) |
|----------------------|---------|--------|--------|----------|
| Intercept            | -0.9977 | 0.1787 | -5.58  | <0.0001  |
| sm=yes               | -0.6452 | 0.4533 | -1.42  | 0.1546   |
| length_stay          | 0.0012  | 0.0042 | 0.30   | 0.7662   |
| sm=yes * length_stay | 0.0241  | 0.0115 | 2.09   | 0.0370   |

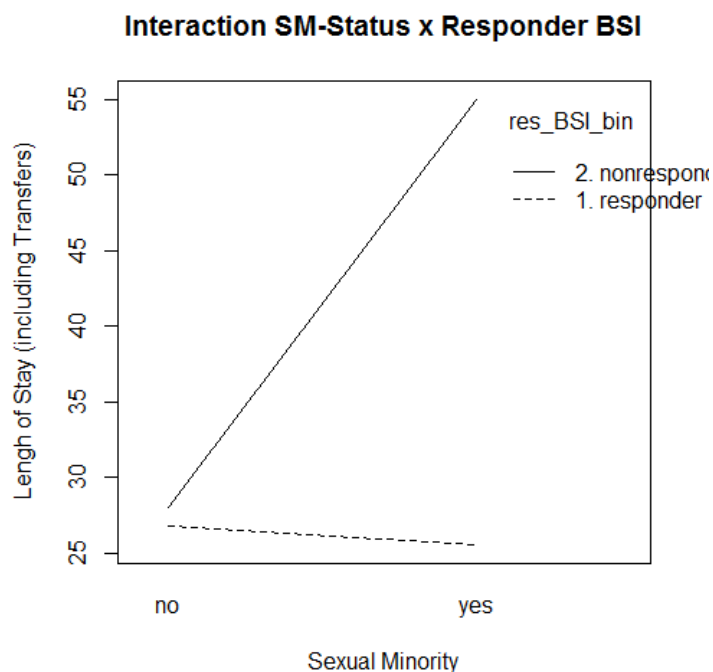

Cohen d responders 0.04 vs. nonresponders 0.69

### 3.1.2 Adjusting for Confounders

#### Full model

```
lrm(formula = res_BSI_bin ~ geschlecht + m_languag + F3 * sm +
      F6 * sm + log(length_stay) * sm)
```

Frequencies of Missing Values Due to Each Variable

| res_BSI_bin | geschlecht | m_languag | F3 | sm | F6 |   |
|-------------|------------|-----------|----|----|----|---|
| length_stay |            |           |    |    |    |   |
| 282         | 0          | 0         | 0  | 0  | 0  | 0 |

|                 |       | Model Likelihood | Discrimination | Rank Discrim. |       |       |       |
|-----------------|-------|------------------|----------------|---------------|-------|-------|-------|
|                 |       | Ratio Test       | Indexes        | Indexes       |       |       |       |
| Obs             | 351   | LR chi2          | 31.60          | R2            | 0.123 | C     | 0.675 |
| 1. responder    | 251   | d.f.             | 9              | g             | 0.738 | Dxy   | 0.351 |
| 2. nonresponder | 100   | Pr(> chi2)       | 0.0002         | gr            | 2.092 | gamma | 0.354 |
| max  deriv      | 3e-07 |                  |                | gp            | 0.138 | tau-a | 0.143 |
|                 |       |                  |                | Brier         | 0.185 |       |       |

|                      | Coef    | S.E.   | wald Z | Pr(> Z ) |
|----------------------|---------|--------|--------|----------|
| Intercept            | -3.5367 | 1.0410 | -3.40  | 0.0007   |
| geschlecht           | 0.5224  | 0.2637 | 1.98   | 0.0476   |
| m_languag            | 0.7328  | 0.3605 | 2.03   | 0.0421   |
| F3=yes               | -0.0887 | 0.3639 | -0.24  | 0.8074   |
| sm=yes               | -2.8614 | 1.8020 | -1.59  | 0.1123   |
| F6=yes               | 0.1745  | 0.3233 | 0.54   | 0.5893   |
| length_stay          | 0.3065  | 0.2259 | 1.36   | 0.1749   |
| F3=yes * sm=yes      | -1.0060 | 0.7764 | -1.30  | 0.1951   |
| sm=yes * F6=yes      | 0.9439  | 0.6868 | 1.37   | 0.1694   |
| sm=yes * length_stay | 0.9976  | 0.5269 | 1.89   | 0.0583   |

| Effects     |     |      |       | Response : res_BSI_bin |         |            |            |
|-------------|-----|------|-------|------------------------|---------|------------|------------|
| Factor      | Low | High | Diff. | Effect                 | S.E.    | Lower 0.95 | Upper 0.95 |
| geschlecht  | 1   | 2    | 1     | 0.522420               | 0.26368 | 0.0056113  | 1.039200   |
| Odds Ratio  | 1   | 2    | 1     | 1.686100               | NA      | 1.0056000  | 2.827000   |
| m_languag   | 1   | 2    | 1     | 0.732840               | 0.36049 | 0.0263010  | 1.439400   |
| Odds Ratio  | 1   | 2    | 1     | 2.081000               | NA      | 1.0267000  | 4.218100   |
| length_stay | 14  | 28   | 14    | 0.212430               | 0.15659 | -0.0944910 | 0.519350   |
| Odds Ratio  | 14  | 28   | 14    | 1.236700               | NA      | 0.9098400  | 1.680900   |
| F3 - no:yes | 2   | 1    | NA    | 0.088744               | 0.36395 | -0.6245800 | 0.802060   |
| Odds Ratio  | 2   | 1    | NA    | 1.092800               | NA      | 0.5354900  | 2.230100   |
| sm - yes:no | 1   | 2    | NA    | -0.830190              | 0.44766 | -1.7076000 | 0.047195   |
| Odds Ratio  | 1   | 2    | NA    | 0.435970               | NA      | 0.1813000  | 1.048300   |
| F6 - yes:no | 1   | 2    | NA    | 0.174530               | 0.32327 | -0.4590600 | 0.808120   |
| Odds Ratio  | 1   | 2    | NA    | 1.190700               | NA      | 0.6318800  | 2.243700   |

Adjusted to: F3=yes sm=no F6=no length\_stay=21



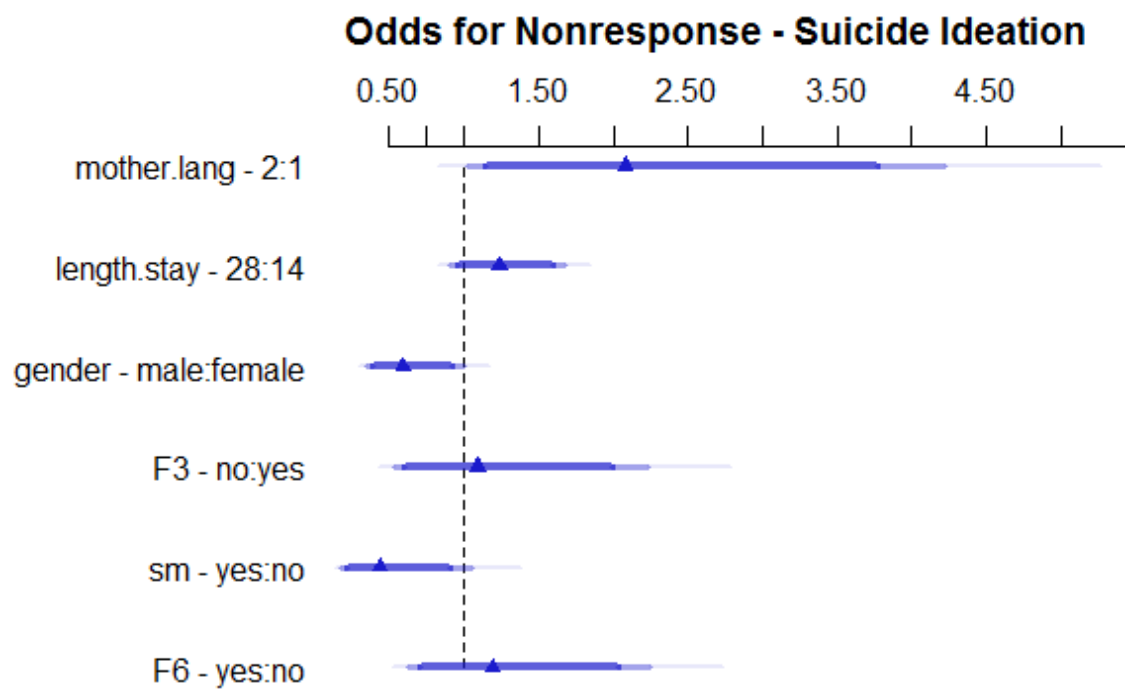

Adjusted to: F3=yes sm=no F6=no length.stay=21

## 3.2 Hopelessness

| res_BHS |              | sm              |                    |     |
|---------|--------------|-----------------|--------------------|-----|
|         | 1. responder | 2. nonresponder | 3. nonpathological |     |
| no      | 93           | 290             |                    | 119 |
| yes     | 22           | 86              |                    | 23  |

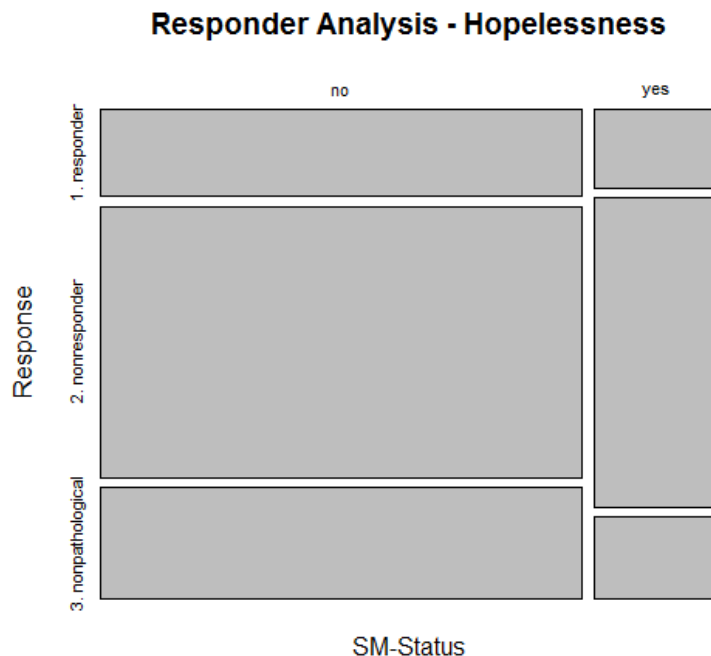

Pearson's Chi-squared test  
 data: sm and res\_BHS  
 X-squared = 3.008, df = 2, p-value = 0.2222

### 3.2.1 Interactions with Confounders

F4 Diagnosis

```
lrm(formula = res_BHS_bin ~ sm * F4)
```

|                 | Obs   |            | Model Likelihood Ratio Test |       | Discrimination Indexes |       | Rank Discrim. Indexes |       |
|-----------------|-------|------------|-----------------------------|-------|------------------------|-------|-----------------------|-------|
|                 |       |            | LR chi2                     | 7.95  | R2                     | 0.024 | C                     | 0.568 |
| 1. responder    | 115   | d.f.       | 3                           | g     | 0.292                  | Dxy   | 0.136                 |       |
| 2. nonresponder | 376   | Pr(> chi2) | 0.0470                      | gr    | 1.340                  | gamma | 0.222                 |       |
| max  deriv      | 4e-10 |            |                             | gp    | 0.049                  | tau-a | 0.049                 |       |
|                 |       |            |                             | Brier | 0.177                  |       |                       |       |

|                 | Coef    | S.E.   | wald Z | Pr(> Z ) |
|-----------------|---------|--------|--------|----------|
| Intercept       | 1.1036  | 0.1410 | 7.83   | <0.0001  |
| sm=yes          | 0.7682  | 0.3678 | 2.09   | 0.0367   |
| F4=yes          | 0.1157  | 0.2640 | 0.44   | 0.6613   |
| sm=yes * F4=yes | -1.4279 | 0.5622 | -2.54  | 0.0111   |

Oddsratio without F4: 2.12 (1.07-4.64) (SM more likely nonresp.)  
 Oddsratio with F4: 0.51 (0.23-1.22)

### 3.2.2 Adjusting for Confounders

#### Full model

Logistic Regression Model

```
lrm(formula = res_BHS_bin ~ nationality + F0 + F4 * sm + log(length_stay))
```

Frequencies of Missing Values Due to Each Variable

| res_BHS_bin | nationality | F0 | F4 | sm | length_stay |
|-------------|-------------|----|----|----|-------------|
| 142         | 0           | 0  | 0  | 0  | 0           |

|                 | Model Likelihood Ratio Test | Discrimination Indexes | Rank Discrim. Indexes |
|-----------------|-----------------------------|------------------------|-----------------------|
| Obs             | 491                         | LR chi2 17.35          | R2 0.052              |
| 1. responder    | 115                         | d.f. 6                 | g 0.499               |
| 2. nonresponder | 376                         | Pr(> chi2) 0.0081      | gr 1.647              |
| max  deriv      | 5e-09                       |                        | gp 0.086              |
|                 |                             | Brier 0.173            | tau-a 0.076           |

|                 | Coef    | S.E.   | wald Z | Pr(> Z ) |
|-----------------|---------|--------|--------|----------|
| Intercept       | -0.4853 | 0.7244 | -0.67  | 0.5029   |
| nationality     | 0.5947  | 0.3874 | 1.54   | 0.1248   |
| F0=yes          | -1.1124 | 0.5380 | -2.07  | 0.0387   |
| F4=yes          | 0.1624  | 0.2688 | 0.60   | 0.5456   |
| sm=yes          | 0.6983  | 0.3710 | 1.88   | 0.0598   |
| length_stay     | 0.3213  | 0.1856 | 1.73   | 0.0834   |
| F4=yes * sm=yes | -1.4914 | 0.5672 | -2.63  | 0.0086   |

| Effects     | Response : res_BHS_bin |      |       |          |         |            |            |
|-------------|------------------------|------|-------|----------|---------|------------|------------|
| Factor      | Low                    | High | Diff. | Effect   | S.E.    | Lower 0.95 | Upper 0.95 |
| nationality | 1                      | 2    | 1     | 0.59466  | 0.38738 | -0.164580  | 1.353900   |
| Odds Ratio  | 1                      | 2    | 1     | 1.81240  | NA      | 0.848250   | 3.872500   |
| length_stay | 14                     | 28   | 14    | 0.22269  | 0.12862 | -0.029413  | 0.474780   |
| Odds Ratio  | 14                     | 28   | 14    | 1.24940  | NA      | 0.971010   | 1.607700   |
| F0 - yes:no | 1                      | 2    | NA    | -1.11240 | 0.53798 | -2.166800  | -0.057957  |
| Odds Ratio  | 1                      | 2    | NA    | 0.32877  | NA      | 0.114540   | 0.943690   |
| F4 - yes:no | 1                      | 2    | NA    | 0.16244  | 0.26877 | -0.364340  | 0.689220   |
| Odds Ratio  | 1                      | 2    | NA    | 1.17640  | NA      | 0.694650   | 1.992200   |
| sm - yes:no | 1                      | 2    | NA    | 0.69832  | 0.37100 | -0.028819  | 1.425500   |
| Odds Ratio  | 1                      | 2    | NA    | 2.01040  | NA      | 0.971590   | 4.159800   |

Adjusted to: F4=no sm=no

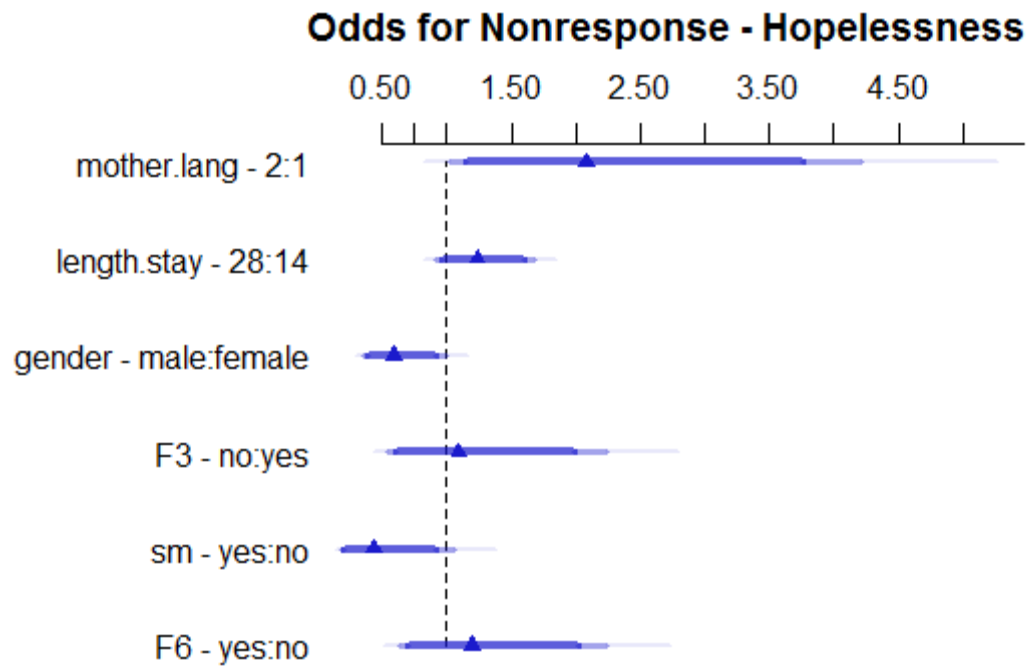

Adjusted to:F3=yes sm=no F6=no length.stay=21

### 3.3 Depression

|     |  | res_BDI      |                 |                   |
|-----|--|--------------|-----------------|-------------------|
| sm  |  | 1. responder | 2. nonresponder | 3.nonpathological |
| no  |  | 304          | 127             | 71                |
| yes |  | 84           | 37              | 10                |

#### Responder Analysis - Depression

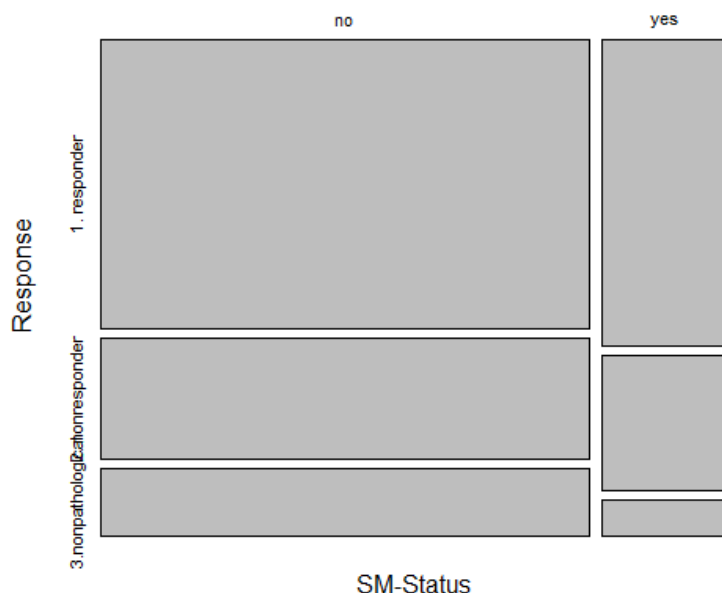

Pearson's Chi-squared test

data: sm and res\_BDI  
X-squared = 4.0038, df = 2, p-value = 0.1351

#### 3.3.1 Interactions with Confounders

Length of Stay

```
lrm(formula = res_BDI_bin ~ sm * length_stay)
Frequencies of Missing Values Due to Each Variable
```

| res_BDI_bin | sm | length_stay |
|-------------|----|-------------|
| 81          | 0  | 0           |

|                 |       | Model Likelihood Ratio Test |        | Discrimination Indexes |       | Rank Discrim. Indexes |       |
|-----------------|-------|-----------------------------|--------|------------------------|-------|-----------------------|-------|
| Obs             | 552   | LR chi2                     | 15.34  | R2                     | 0.039 | C                     | 0.584 |
| 1. responder    | 388   | d.f.                        | 3      | g                      | 0.240 | Dxy                   | 0.168 |
| 2. nonresponder | 164   | Pr(> chi2)                  | 0.0015 | gr                     | 1.271 | gamma                 | 0.196 |
| max  deriv      | 3e-08 |                             |        | gp                     | 0.043 | tau-a                 | 0.070 |
|                 |       |                             |        | Brier                  | 0.203 |                       |       |

|                      | Coef    | S.E.   | Wald Z | Pr(> Z ) |
|----------------------|---------|--------|--------|----------|
| Intercept            | -0.9010 | 0.1448 | -6.22  | <0.0001  |
| sm=yes               | -0.8932 | 0.4087 | -2.19  | 0.0288   |
| length_stay          | 0.0011  | 0.0039 | 0.29   | 0.7748   |
| sm=yes * length_stay | 0.0315  | 0.0121 | 2.59   | 0.0095   |

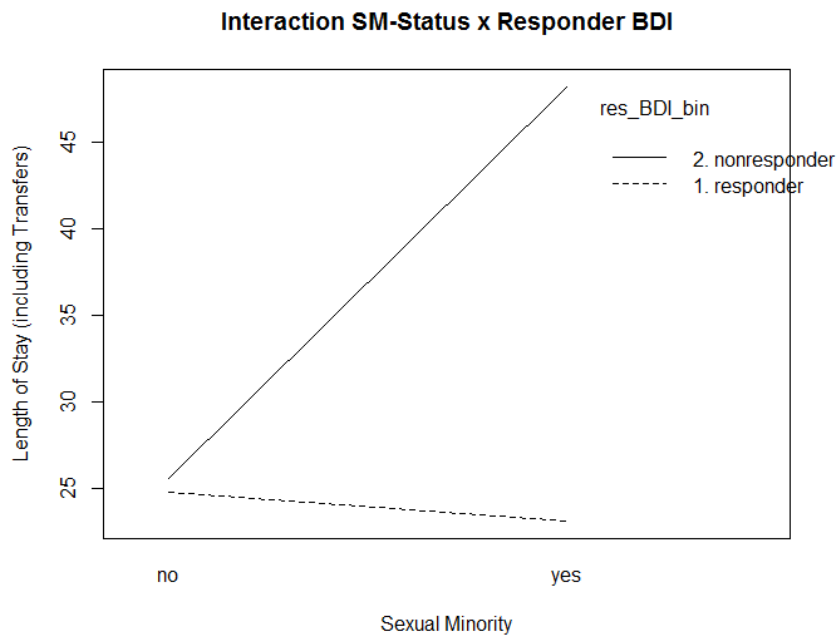

Cohen d responders 0.06 vs. nonresponders 0.73

### 3.3.2 Adjusting for Confounders

#### Full model

```
lrm(formula = res_BDI_bin ~ income + m_languag + F6 + log(length_stay)
*
sm)
```

Frequencies of Missing Values Due to Each Variable

| res_BDI_bin | income | m_languag | F6 | length_stay | sm |
|-------------|--------|-----------|----|-------------|----|
| 81          | 0      | 0         | 0  | 0           | 0  |

|                 |      | Model Likelihood Ratio Test |         | Discrimination Indexes |       | Rank Discrim. Indexes |       |
|-----------------|------|-----------------------------|---------|------------------------|-------|-----------------------|-------|
| Obs             | 552  | LR chi2                     | 52.36   | R2                     | 0.129 | C                     | 0.674 |
| 1. responder    | 388  | d.f.                        | 6       | g                      | 0.743 | Dxy                   | 0.348 |
| 2. nonresponder | 164  | Pr(> chi2)                  | <0.0001 | gr                     | 2.102 | gamma                 | 0.350 |
| max  deriv      | 0.02 |                             |         | gp                     | 0.145 | tau-a                 | 0.145 |
|                 |      |                             |         | Brier                  | 0.189 |                       |       |

|                      | Coef    | S.E.   | wald z | Pr(> Z ) |
|----------------------|---------|--------|--------|----------|
| Intercept            | -2.9233 | 0.7151 | -4.09  | <0.0001  |
| income               | -0.0002 | 0.0001 | -1.84  | 0.0663   |
| m_languag            | 1.3052  | 0.2995 | 4.36   | <0.0001  |
| F6=yes               | 0.4994  | 0.2312 | 2.16   | 0.0308   |
| length_stay          | 0.2515  | 0.1838 | 1.37   | 0.1712   |
| sm=yes               | -3.7088 | 1.4048 | -2.64  | 0.0083   |
| length_stay * sm=yes | 1.1305  | 0.4282 | 2.64   | 0.0083   |

| Effects     |        | Response : res_BDI_bin |        |          |          |            |                   |  |
|-------------|--------|------------------------|--------|----------|----------|------------|-------------------|--|
| Factor      | Low    | High                   | Diff.  | Effect   | S.E.     | Lower 0.95 | Upper 0.95        |  |
| income      | 745.39 | 1537.2                 | 791.82 | -0.18265 | 0.099453 | -0.377580  | 0.012271          |  |
| Odds Ratio  | 745.39 | 1537.2                 | 791.82 | 0.83306  |          | NA         | 0.685520 1.012300 |  |
| m_languag   | 1.00   | 2.0                    | 1.00   | 1.30520  | 0.299500 | 0.718160   | 1.892200          |  |
| Odds Ratio  | 1.00   | 2.0                    | 1.00   | 3.68830  |          | NA         | 2.050700 6.633900 |  |
| length_stay | 14.00  | 28.0                   | 14.00  | 0.17435  | 0.127420 | -0.075388  | 0.424090          |  |
| Odds Ratio  | 14.00  | 28.0                   | 14.00  | 1.19050  |          | NA         | 0.927380 1.528200 |  |
| F6 - yes:no | 1.00   | 2.0                    | NA     | 0.49936  | 0.231230 | 0.046166   | 0.952550          |  |
| Odds Ratio  | 1.00   | 2.0                    | NA     | 1.64770  |          | NA         | 1.047200 2.592300 |  |
| sm - yes:no | 1.00   | 2.0                    | NA     | -0.26707 | 0.262130 | -0.780840  | 0.246700          |  |
| Odds Ratio  | 1.00   | 2.0                    | NA     | 0.76562  |          | NA         | 0.458020 1.279800 |  |

Adjusted to: length\_stay=21 sm=no

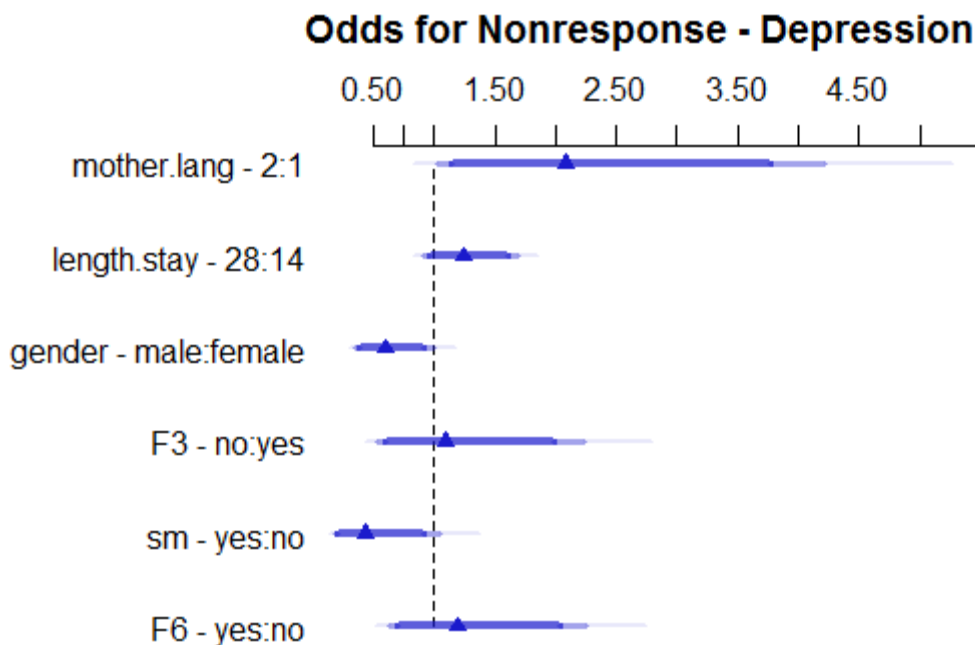

Adjusted to: F3=yes sm=no F6=no length.stay=21

## 4 Treatment Expectancy

### Linear Regression – SM Status as only predictor

Residuals:

| Min     | 1Q      | Median | 3Q     | Max    |
|---------|---------|--------|--------|--------|
| -73.127 | -15.127 | 3.873  | 19.873 | 26.873 |

Coefficients:

|             | Estimate | Std. Error | t value | Pr(> t )   |
|-------------|----------|------------|---------|------------|
| (Intercept) | 73.1275  | 1.0372     | 70.503  | <2e-16 *** |
| smyes       | 0.5748   | 2.2800     | 0.252   | 0.801      |

---  
Signif. codes: 0 '\*\*\*' 0.001 '\*\*' 0.01 '\*' 0.05 '.' 0.1 ' ' 1

Residual standard error: 23.24 on 631 degrees of freedom  
Multiple R-squared: 0.0001007, Adjusted R-squared: -0.001484  
F-statistic: 0.06356 on 1 and 631 DF, p-value: 0.801

### 3.4 Interaction with Confounders

#### 3.4.1 Nationality

```
lm(formula = EXPECTANCY ~ sm * nationality)
```

Residuals:

| Min     | 1Q      | Median | 3Q     | Max    |
|---------|---------|--------|--------|--------|
| -72.778 | -14.778 | 4.017  | 20.017 | 34.200 |

Coefficients:

|                   | Estimate | Std. Error | t value | Pr(> t )   |
|-------------------|----------|------------|---------|------------|
| (Intercept)       | 69.857   | 3.721      | 18.773  | <2e-16 *** |
| smyes             | 16.309   | 8.265      | 1.973   | 0.0489 *   |
| nationality       | 2.922    | 3.192      | 0.915   | 0.3604     |
| smyes:nationality | -14.104  | 7.122      | -1.980  | 0.0481 *   |

---  
Signif. codes: 0 '\*\*\*' 0.001 '\*\*' 0.01 '\*' 0.05 '.' 0.1 ' ' 1

Residual standard error: 23.2 on 629 degrees of freedom  
Multiple R-squared: 0.006298, Adjusted R-squared: 0.001558  
F-statistic: 1.329 on 3 and 629 DF, p-value: 0.264

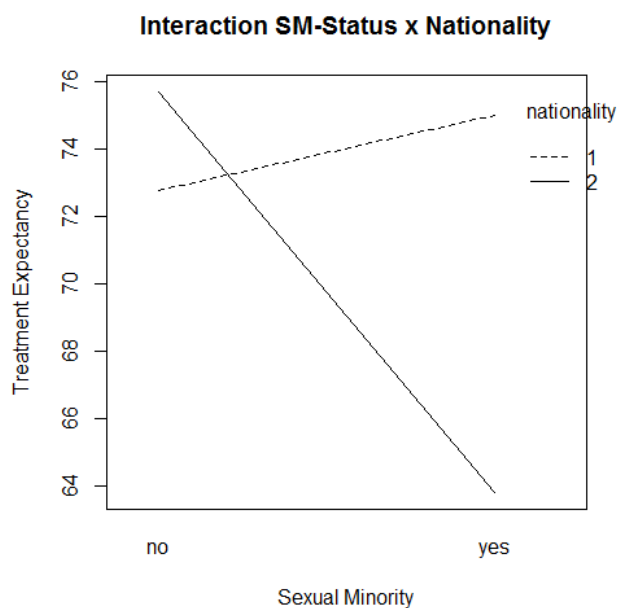



### 3.5 Adjusting for Confounders

#### Full Multivariate Model

```
lm(formula = EXPECTANCY ~ age + education + F1 + F3 + F6 + F8 +
    log(length.stay) + nationality * sm)
```

Residuals:

```
   Min       1Q   Median       3Q      Max
-76.76 -13.13   3.90   16.91   38.52
```

Coefficients:

|                   | Estimate  | Std. Error | t value | Pr(> t ) |     |
|-------------------|-----------|------------|---------|----------|-----|
| (Intercept)       | 73.33841  | 6.63933    | 11.046  | < 2e-16  | *** |
| age               | 0.33529   | 0.07592    | 4.416   | 1.19e-05 | *** |
| education         | -2.71690  | 0.82170    | -3.306  | 0.000999 | *** |
| F1yes             | 3.11889   | 2.02283    | 1.542   | 0.123619 |     |
| F3yes             | -6.01239  | 2.17746    | -2.761  | 0.005929 | **  |
| F6yes             | -5.46526  | 2.33113    | -2.344  | 0.019368 | *   |
| F8yes             | -7.68336  | 5.39733    | -1.424  | 0.155079 |     |
| log(length.stay)  | -1.70657  | 1.46991    | -1.161  | 0.246085 |     |
| nationality       | 2.66771   | 3.10681    | 0.859   | 0.390856 |     |
| smyes             | 16.52923  | 8.05765    | 2.051   | 0.040649 | *   |
| nationality:smyes | -12.69204 | 6.97115    | -1.821  | 0.069140 | .   |

---

Signif. codes: 0 '\*\*\*' 0.001 '\*\*' 0.01 '\*' 0.05 '.' 0.1 ' ' 1

Residual standard error: 22.52 on 622 degrees of freedom

Multiple R-squared: 0.07458, Adjusted R-squared: 0.0597

F-statistic: 5.013 on 10 and 622 DF, p-value: 4.996e-07

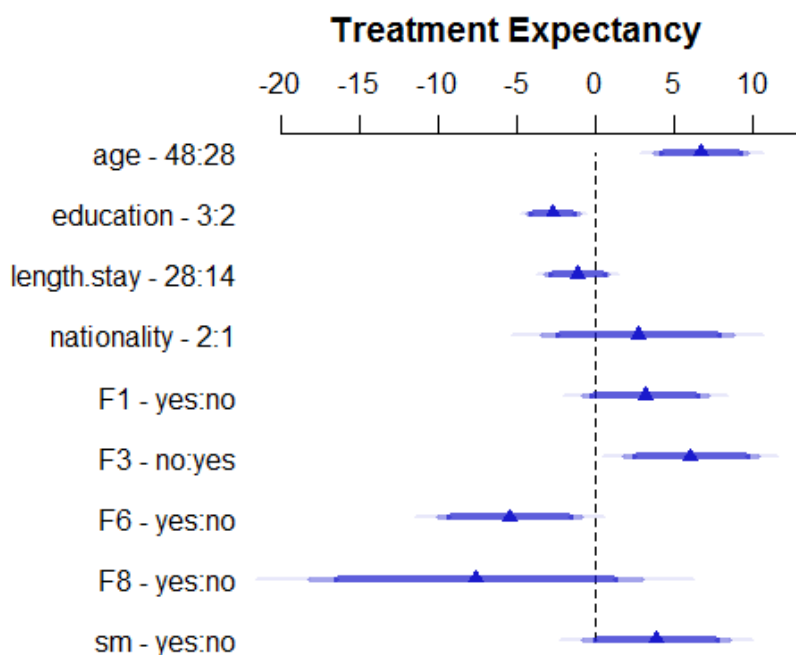

Adjusted to:nationality=1 sm=no

## 5 Working Alliance

### Linear Regression – SM Status as only predictor

Residuals:

| Min     | 1Q     | Median | 3Q    | Max    |
|---------|--------|--------|-------|--------|
| -29.542 | -5.542 | 1.458  | 7.458 | 12.458 |

Coefficients:

|             | Estimate | Std. Error | t value | Pr(> t )   |
|-------------|----------|------------|---------|------------|
| (Intercept) | 47.5420  | 0.4093     | 116.140 | <2e-16 *** |
| smyes       | 0.8301   | 0.9039     | 0.918   | 0.359      |

---  
Signif. codes: 0 '\*\*\*' 0.001 '\*\*' 0.01 '\*' 0.05 '.' 0.1 ' ' 1

Residual standard error: 9.153 on 627 degrees of freedom

(4 observations deleted due to missingness)

Multiple R-squared: 0.001343, Adjusted R-squared: -0.0002495

F-statistic: 0.8433 on 1 and 627 DF, p-value: 0.3588

### 3.6 Interaction with Confounders

#### Nationality

```
lm(formula = WORKING_ALLIANCE ~ sm * nationality)
```

Residuals:

| Min    | 1Q    | Median | 3Q   | Max   |
|--------|-------|--------|------|-------|
| -29.70 | -5.70 | 1.30   | 7.30 | 16.27 |

Coefficients:

|                   | Estimate | Std. Error | t value | Pr(> t )   |
|-------------------|----------|------------|---------|------------|
| (Intercept)       | 49.017   | 1.460      | 33.583  | <2e-16 *** |
| smyes             | 7.741    | 3.248      | 2.384   | 0.0174 *   |
| nationality       | -1.317   | 1.252      | -1.052  | 0.2932     |
| smyes:nationality | -6.196   | 2.794      | -2.218  | 0.0269 *   |

---  
Signif. codes: 0 '\*\*\*' 0.001 '\*\*' 0.01 '\*' 0.05 '.' 0.1 ' ' 1

Residual standard error: 9.094 on 625 degrees of freedom

(4 observations deleted due to missingness)

Multiple R-squared: 0.0173, Adjusted R-squared: 0.01259

F-statistic: 3.669 on 3 and 625 DF, p-value: 0.01217

F-statistic: 1.329 on 3 and 629 DF, p-value: 0.264

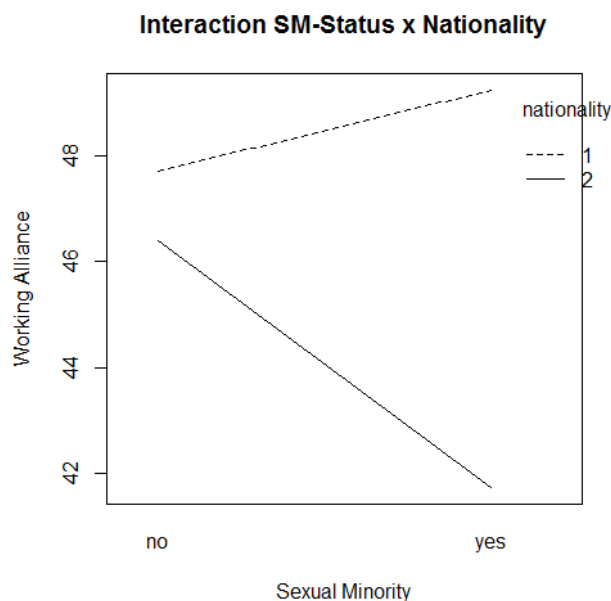

Length of stay

```
lm(formula = WORKING_ALLIANCE ~ sm * length_stay)
```

Residuals:

| Min     | 1Q     | Median | 3Q    | Max    |
|---------|--------|--------|-------|--------|
| -29.545 | -5.756 | 1.175  | 7.217 | 14.620 |

Coefficients:

|                   | Estimate | Std. Error | t value | Pr(> t )   |
|-------------------|----------|------------|---------|------------|
| (Intercept)       | 48.18007 | 0.56586    | 85.144  | <2e-16 *** |
| smyes             | 2.91048  | 1.20213    | 2.421   | 0.0158 *   |
| length_stay       | -0.02648 | 0.01643    | -1.612  | 0.1075     |
| smyes:length_stay | -0.06416 | 0.02856    | -2.246  | 0.0250 *   |

Signif. codes: 0 '\*\*\*' 0.001 '\*\*' 0.01 '\*' 0.05 '.' 0.1 ' ' 1

Residual standard error: 9.041 on 625 degrees of freedom  
(4 observations deleted due to missingness)

Multiple R-squared: 0.02876, Adjusted R-squared: 0.0241

F-statistic: 6.169 on 3 and 625 DF, p-value: 0.0003902

**Interaction SM-Status x Length of Stay**

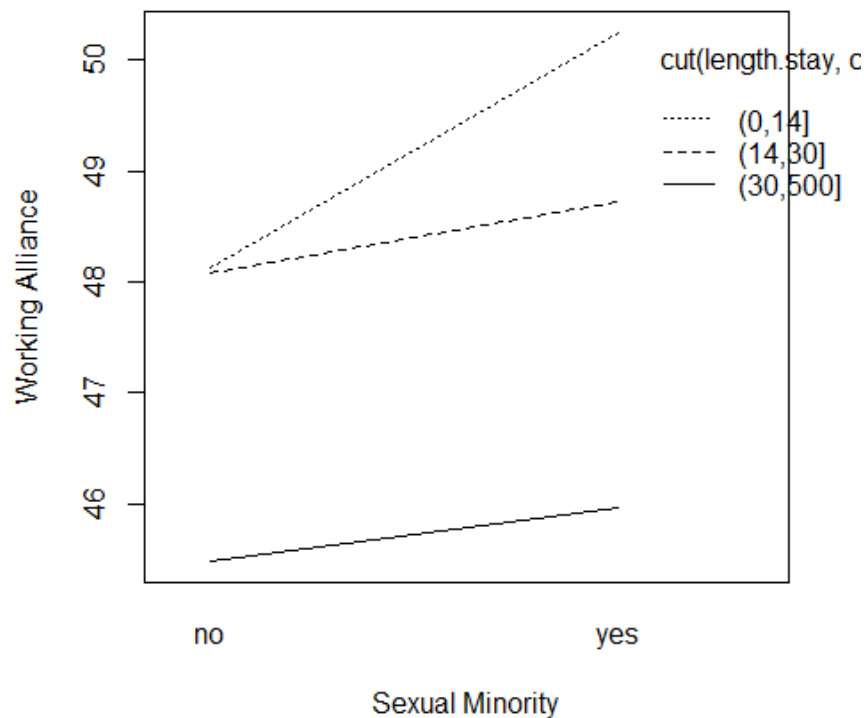

### 3.7 Adjusting for Confounders

#### Full Multivariate Model

```
lm(formula = WORKING_ALLIANCE ~ age + income + mother.lang + F6 +
    nationality *
    sm + log(length.stay) * sm)
```

Residuals:

| Min     | 1Q     | Median | 3Q    | Max    |
|---------|--------|--------|-------|--------|
| -27.846 | -5.006 | 1.324  | 6.783 | 15.705 |

Coefficients:

|                        | Estimate   | Std. Error | t value | Pr(> t ) |     |
|------------------------|------------|------------|---------|----------|-----|
| (Intercept)            | 53.1870257 | 2.8033334  | 18.973  | < 2e-16  | *** |
| age                    | 0.0372529  | 0.0300199  | 1.241   | 0.215098 |     |
| income                 | 0.0008752  | 0.0003190  | 2.744   | 0.006251 | **  |
| mother.lang            | -2.1360386 | 1.3435372  | -1.590  | 0.112377 |     |
| F6yes                  | -3.2776815 | 0.9042098  | -3.625  | 0.000313 | *** |
| nationality            | -0.4411467 | 1.3462041  | -0.328  | 0.743252 |     |
| smyes                  | 12.7364565 | 5.0569053  | 2.519   | 0.012032 | *   |
| log(length.stay)       | -1.6213674 | 0.6572585  | -2.467  | 0.013900 | *   |
| nationality:smyes      | -5.1899957 | 2.7390247  | -1.895  | 0.058580 | .   |
| smyes:log(length.stay) | -1.6774997 | 1.3338478  | -1.258  | 0.208996 |     |
| ---                    |            |            |         |          |     |

Signif. codes: 0 '\*\*\*' 0.001 '\*\*' 0.01 '\*' 0.05 '.' 0.1 ' ' 1

Residual standard error: 8.796 on 619 degrees of freedom

(4 observations deleted due to missingness)

Multiple R-squared: 0.08961, Adjusted R-squared: 0.07637

F-statistic: 6.77 on 9 and 619 DF, p-value: 2.678e-09

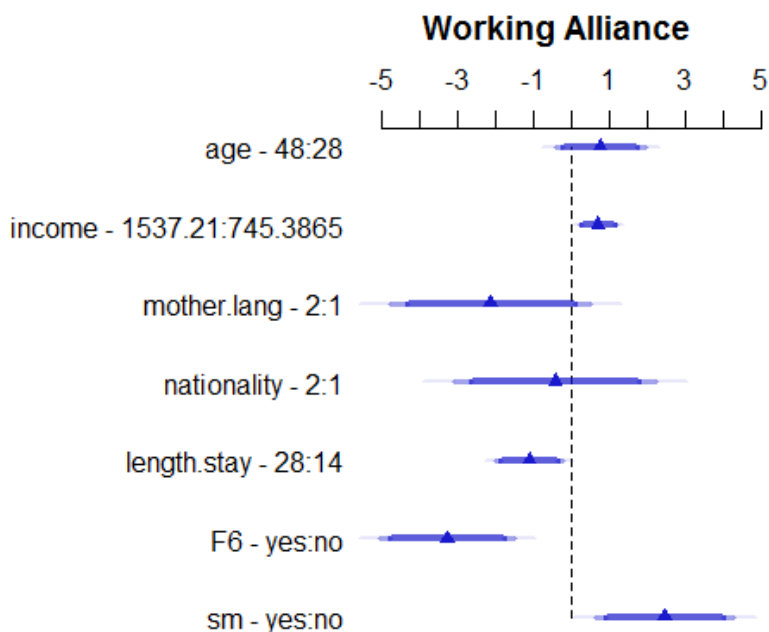

Adjusted to:nationality=1 sm=no length.stay=21
